# Supplementary material for: Expression Patterns of Circular RNAs from Primary Kinase Transcripts in the Mammary Glands of Lactating Rats
Source: PubMed Central journal article supplement — J Breast Cancer. 2015 Sep 24;18(3):235–41. doi: 10.4048/jbc.2015.18.3.235 (PMC4600687; doi:10.4048/jbc.2015.18.3.235), 2015-09-24
Supplement: jbc-18-235-s001.pdf [file jbc-18-235-s001.pdf]

**Supplementary Table 1.** The polymerase chain reaction primers for circular RNA validation

| circRNAs      | Gene            | Outward primer                                   | Inward primer                                     |
|---------------|-----------------|--------------------------------------------------|---------------------------------------------------|
| circRNA_555   | <i>Tc2n</i>     | GGCACAATACCTTCCAAGTTCA<br>CCTTCAGTAAGCGTGTCTTCTT | AAGAAGACACGCTTACTGAAGG<br>TGAAC TTGGAAGGTATTGTGCC |
| circRNA_127   | <i>Arhgap10</i> | GAACCTTATCGCTGCCACCAA<br>GCACCGTTCATCATCAGTCTCA  | GCACAGTTGATAAGATGGGAT<br>ACTGCTTCCTTTCCTTCTGA     |
| circRNA_3385  | <i>Hnrmpm</i>   | ATTGATGCCAACCACCTGAACA<br>GCTCCACCTCCTCCTTGCTT   | CAGGATGAGAGGGCTTTACCAA<br>ATGCTGCTCGGACCACCA      |
| circRNA_659   | <i>Cox4i1</i>   | TATGTTGATCGGCGTGACTACC<br>CCACCACTGTCTCCACTCATT  | TTCAGTGTACCGCATCCAGTT<br>AGTCACGCCGATCAACATAAGA   |
| circRNA_10008 | <i>Zmynd11</i>  | AGGCATATTGACTCCACTGACA<br>AACTGGCTGGCTCGCTTCT    | GAACCTTATCGCTGCCACCAA<br>GCACCGTTCATCATCAGTCTCA   |
| circRNA_537   | <i>Tead1</i>    | GCTACCGCCATCCACAACAA<br>GGCTGTCTGTGTATCATCC      | TCACATTCAGGTTCTTGCCAGA<br>TTGTCTTCCCGTCTCAGTTT    |
| circRNA_388   | <i>Gnaq</i>     | CCTTCCTATCTGCCTACACAAC<br>CTCTCCTCCATTCGGTTCTCAT | GGCAAGAGTACCTTCATTAAGC<br>AGCACATCAGTACCTACAAC    |
| circRNA_15703 | <i>Nars</i>     | ACAGGTTACGAAGGCAAGGAA<br>ACGCTACTCTCAGTGGACAAG   | AAAGAGCCGTTTCCCACCATTT<br>ACAACGCCATGTGCTCAGAA    |
| circRNA_7070  | <i>Hdac4</i>    | AAGCACAAGCAACAGTCCAG<br>GCCTCTACTTCTTCTCCTCAC    | GGGAATTTGGAGCGTGTGGA<br>CCACTGGCAGCGTCTTGTA       |
| circRNA_36159 | <i>Eef1a1</i>   | CTGATTGTTGCTGCTGGTGTTG<br>TGTATGGTGGCTCGGTGGAA   | GCTTCTCTGACTACCCTCCACT<br>GCAGCATCACCAGACTTCAAGA  |
| circRNA_4815  | <i>Climn</i>    | GCACCGACTCAGATTCTTCTTA<br>GACCGCCACACCATACTTCC   | ACCGACTCAGATTCTTCTTACC<br>GATGCTAACCAGCTTGACTTCC  |

circRNAs = circular RNAs.
