# Supplementary material for: Expression Patterns of Circular RNAs from Primary Kinase Transcripts in the Mammary Glands of Lactating Rats
Source: PubMed Central journal article supplement — J Breast Cancer. 2015 Sep 24;18(3):235–41. doi: 10.4048/jbc.2015.18.3.235 (PMC4600687; doi:10.4048/jbc.2015.18.3.235), 2015-09-24
Supplement: jbc-18-235-s002.pdf [file jbc-18-235-s002.pdf]

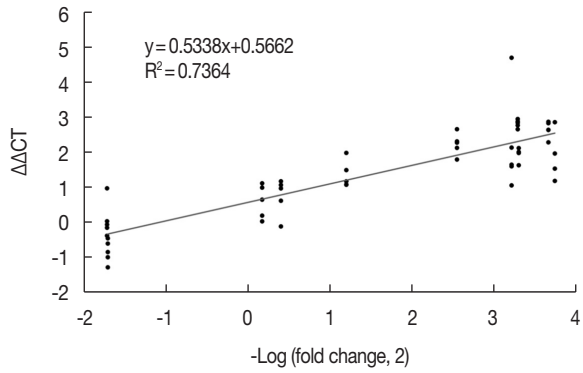

**Supplementary Figure 1.** Correlation of relative expression value quantified by qPCR with that analyzed by RNA sequencing. Y-axis, representing the circRNA abundance differentiation between rat mammary glands at day 1 and day 7 as measured by qPCR; X-axis, representing the circRNA abundance differentiation between rat mammary glands at day 1 and day 7 as measured by RNA-sequencing.
